# Supplementary material for: Psychometric Characteristics of the Oxford Grief Memory Characteristics Scale and Its Relationship With Symptoms of ICD-11 and DSM-5-TR Prolonged Grief Disorder
Source: Frontiers journal article supplement (doi:10.3389/fpsyt.2022.814171), 2022-03-16
Supplement: Data_Sheet_1.PDF [file Data_Sheet_1.PDF]

## Supplementary material

Table A1.

*Means and standard deviations of memory scale items and global scores across time points in the longitudinal sample*

| Loss-related memory characteristics items – Shortened Scale and Removed Items |                                                                                                 | T1 M (SD)     | T2 M (SD)     | T3 M (SD)     |
|-------------------------------------------------------------------------------|-------------------------------------------------------------------------------------------------|---------------|---------------|---------------|
| 1                                                                             | In the last week, approximately how often did unwanted memories of the loss pop into your mind? | 2.50 (1.27)   | 1.94 (1.22)   | 1.54 (1.25)   |
| 2                                                                             | How distressing were these memories?                                                            | 2.36 (1.23)   | 1.99 (1.18)   | 1.67 (1.24)   |
| 3                                                                             | To what extent were you reliving your experience of the loss?                                   | 2.37 (1.37)   | 1.79 (1.34)   | 1.42 (1.32)   |
| 4                                                                             | The physical pain of loss is something I carry everywhere.                                      | 2.42 (1.44)   | 1.75 (1.45)   | 1.65 (1.47)   |
| 5                                                                             | When I remember the loss it feels unreal.                                                       | 2.63 (1.30)   | 2.04 (1.42)   | 1.88 (1.40)   |
| 6                                                                             | Seeing other people with their partners or families makes me painfully aware of my loss.        | 2.31 (1.50)   | 2.09 (1.46)   | 1.86 (1.45)   |
| 7                                                                             | Many different things trigger distressing memories of the loss.                                 | 2.44 (1.35)   | 2.12 (1.29)   | 1.68 (1.32)   |
| 8                                                                             | If my mind is distracted from my grief for a while it will hit me like a wave later.            | 2.21 (1.44)   | 1.75 (1.44)   | 1.29 (1.41)   |
| 9                                                                             | When I remember the loss, I feel the same emotions I felt at the time.                          | 2.40 (1.26)   | 1.87 (1.26)   | 1.68 (1.29)   |
| 10                                                                            | When I try to remember good times we have shared, memories of the loss pop up.                  | 2.34 (1.31)   | 1.97 (1.26)   | 1.68 (1.33)   |
| 11                                                                            | The loss feels as if part of my body is missing.                                                | 1.90 (1.60)   | 1.54 (1.56)   | 1.35 (1.54)   |
| 12                                                                            | Many things in everyday life trigger overwhelming sadness.                                      | 2.39 (1.35)   | 1.81 (1.37)   | 1.51 (1.29)   |
| 13                                                                            | Even nice memories cause me to feel significant pain.                                           | 2.01 (1.32)   | 1.62 (1.30)   | 1.36 (1.23)   |
| 14                                                                            | When I remember something I did in the past; it feels like I am no longer the same person.      | 1.80 (1.47)   | 1.81 (1.43)   | 1.77 (1.44)   |
| 15                                                                            | I feel a strong urge to comfort [-].                                                            | 2.27 (1.54)   | 1.90 (1.54)   | 1.76 (1.51)   |
| 16                                                                            | I struggle to remember positive times without [-].                                              | 1.15 (1.38)   | 0.98 (1.22)   | 0.83 (1.17)   |
| R                                                                             | When I think about [-] I will always think about how they died.                                 | 2.15 (1.40)   | 1.91 (1.34)   | 1.74 (1.28)   |
| R                                                                             | To what extent did they seem to be happening now instead of being something from the past?      | 1.70 (1.34)   | 1.14 (1.20)   | .95 (1.17)    |
| R                                                                             | The memories of [-]'s death make my body ache with overwhelming fatigue.                        | 1.95 (1.54)   | 1.52 (1.48)   | 1.27 (1.42)   |
| R                                                                             | I am reminded of the loss for no apparent reason.                                               | 2.74 (1.43)   | 2.36 (1.28)   | 2.00 (1.29)   |
| R                                                                             | When I think of [-] all I can remember is their suffering.                                      | 1.36 (1.27)   | 1.13 (1.15)   | 1.05 (1.14)   |
| R                                                                             | My memories of [-] are so vivid it feels like they are here.                                    | 1.96 (1.40)   | 1.63 (1.33)   | 1.30 (1.32)   |
| R                                                                             | When I remember things we did together it feels like I am no longer the same person.            | 1.86 (1.41)   | 1.83 (1.41)   | 1.66 (1.45)   |
| R                                                                             | Memories of things we did together are painful.                                                 | 1.56 (1.35)   | 1.21 (1.24)   | 1.10 (1.22)   |
| R                                                                             | Looking at a calendar mainly reminds me of the bad things that happened on those days.          | 1.40 (1.40)   | 1.37 (1.44)   | 1.36 (1.36)   |
| R                                                                             | I hardly remember anything that I did without [-].                                              | .89 (1.33)    | .93 (1.35)    | .83 (1.22)    |
| R                                                                             | I find myself suddenly overcome to find [-].                                                    | 1.59 (1.53)   | 1.16 (1.37)   | 1.03 (1.32)   |
| Global mean OG-M (SD) range 0-108                                             |                                                                                                 | 54.20 (25.43) | 44.07 (26.40) | 38.65 (27.02) |
| Global mean OG-M-S (SD) range 0 - 64                                          |                                                                                                 | 35.19 (16.01) | 28.25 (16.78) | 24.50 (17.13) |

Table A2.

*Analyses of the Oxford Grief loss-related memory characteristics short scale (OG-M-S)*

| Loss-related memories items |                                                                                                 | Factor |     |
|-----------------------------|-------------------------------------------------------------------------------------------------|--------|-----|
|                             |                                                                                                 | 1      |     |
|                             |                                                                                                 | EFA    | CFA |
| 1                           | In the last week, approximately how often did unwanted memories of the loss pop into your mind? | .69    | .77 |
| 2                           | How distressing were these memories?                                                            | .85    | .85 |
| 3                           | To what extent were you reliving your experience of the loss?                                   | .86    | .82 |
| 4                           | The physical pain of loss is something I carry everywhere.                                      | .86    | .82 |
| 5                           | When I remember the loss it feels unreal.                                                       | .69    | .61 |
| 6                           | Seeing other people with their partners or families makes me painfully aware of my loss.        | .67    | .66 |
| 7                           | Many different things trigger distressing memories of the loss.                                 | .84    | .85 |
| 8                           | If my mind is distracted from my grief for a while it will hit me like a wave later.            | .82    | .81 |
| 9                           | When I remember the loss, I feel the same emotions I felt at the time.                          | .61    | .68 |
| 10                          | When I try to remember good times we have shared, memories of the loss pop up.                  | .69    | .74 |
| 11                          | The loss feels as if part of my body is missing.                                                | .80    | .79 |
| 12                          | Many things in everyday life trigger overwhelming sadness.                                      | .84    | .82 |
| 13                          | Even nice memories cause me to feel significant pain.                                           | .83    | .76 |
| 14                          | When I remember something I did in the past; it feels like I am no longer the same person.      | .70    | .65 |
| 15                          | I feel a strong urge to comfort [-].                                                            | .58    | .68 |
| 16                          | I struggle to remember positive times without [-].                                              | .66    | .64 |

Notes: EFA (N = 348) CFA (N=328). Factor labelled as Loss-Related Memory Characteristics. All factor loadings significant to  $p < .05$ .

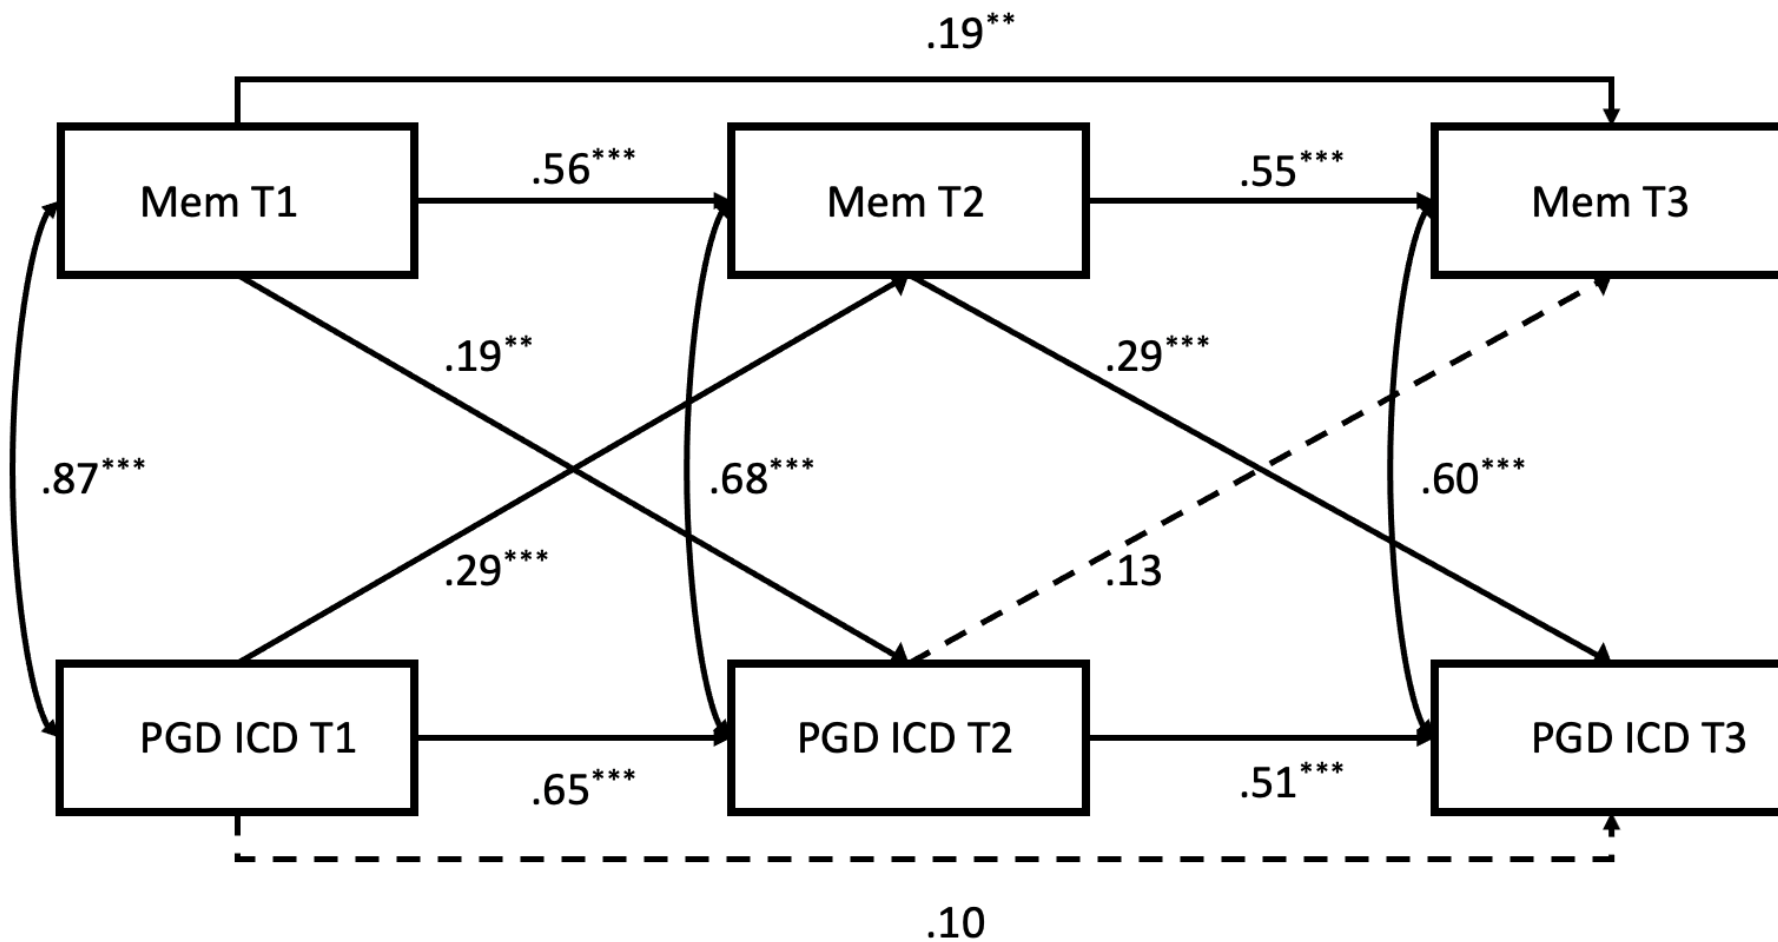

**Fig A1.** Autoregressive cross-lagged model of PGD ICD-11 and loss-related memory characteristics (short scale).

*Note:* Standardised coefficients are shown. Broken lines indicate non-significant paths. MEM = The Oxford Grief Memory Characteristics – Short Scale (OG-M-S) PGD ICD = Prolonged Grief Disorder according to the ICD-11 diagnostic criteria.

Asterisks indicate significant associations (\* $p < .05$ , \*\* $p < .01$ , \*\*\* $p < .001$ ).

$\chi^2 = 1.64$ ,  $df = 2$ ,  $p > .05$ , RMSEA = .00 (.00 - .11), CFI = 1.00 TLI = 1.00

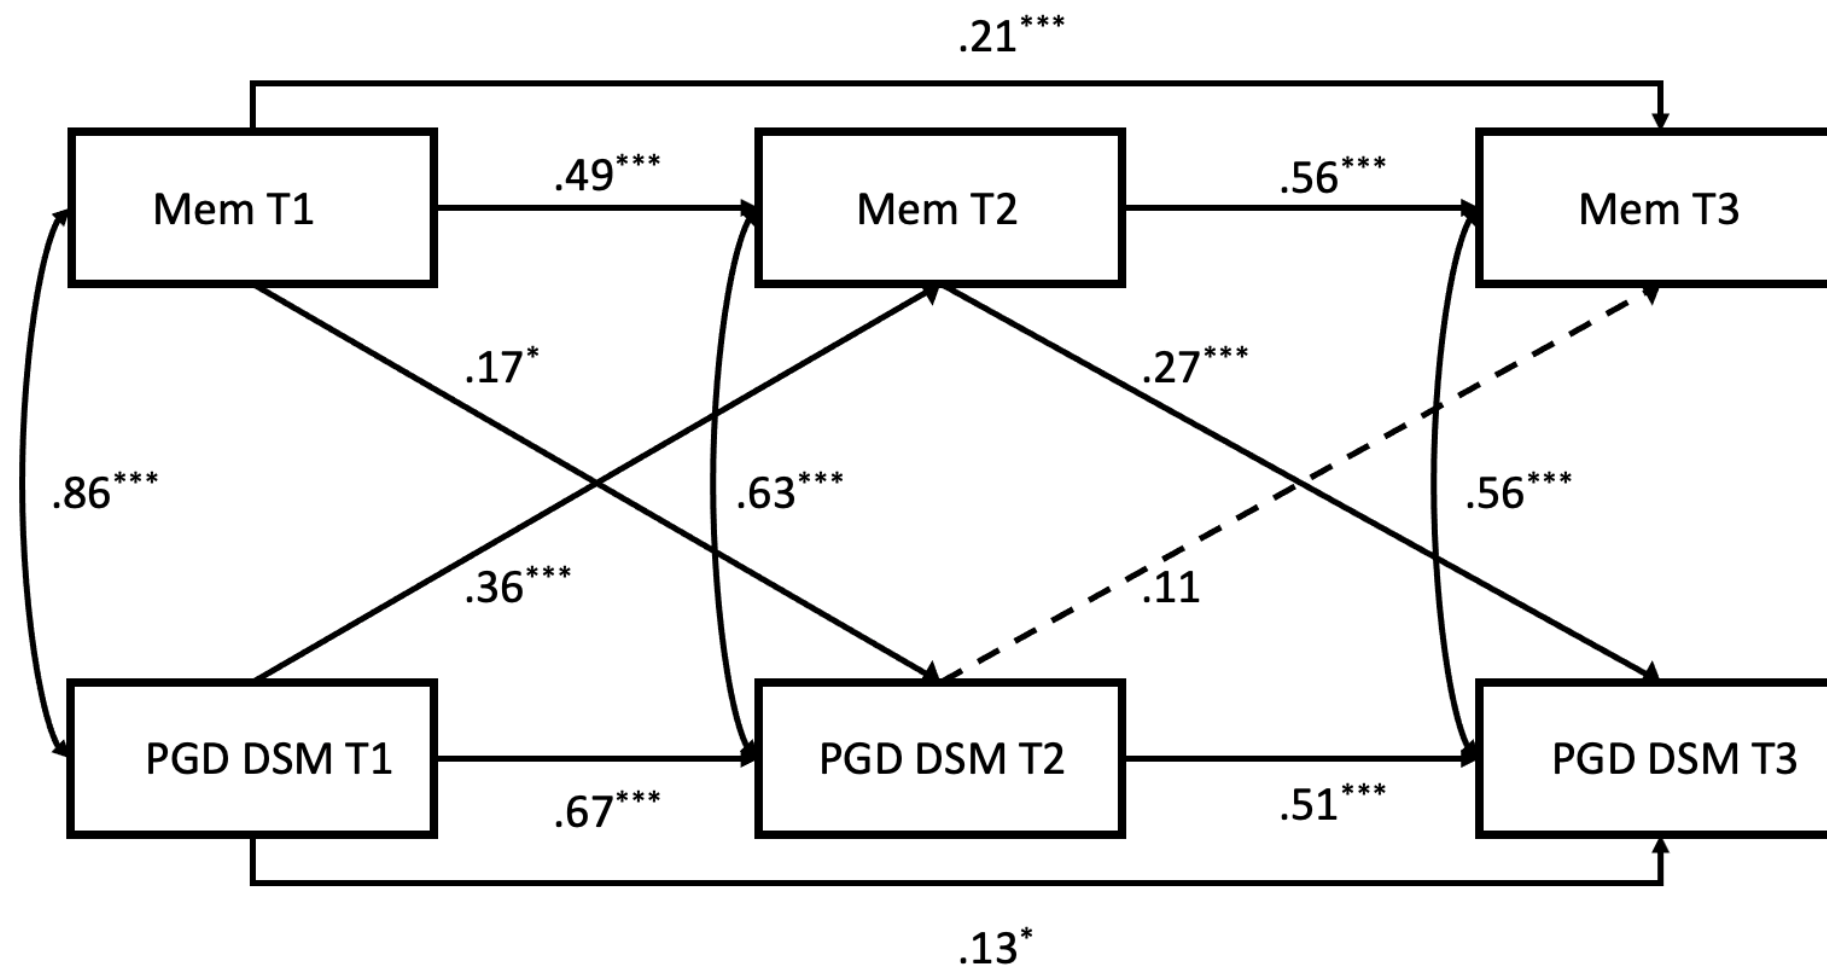

**Fig A2.** Autoregressive cross-lagged model of PGD DSM-5-TR and loss-related memory characteristics (short scale).

*Note:* Standardised coefficients are shown. Broken lines indicate non-significant paths. MEM = The Oxford Grief Memory Characteristics – Short Scale (OG-M-S) PGD DSM= Prolonged Grief Disorder according to the DSM-5-TR diagnostic criteria.

Asterisks indicate significant associations (\* $p < .05$ , \*\* $p < .01$ , \*\*\* $p < .001$ ).

$\chi^2 = 2.28$ ,  $df = 2$ ,  $p > .05$ , RMSEA = .039 (.00 - .13), CFI = 1.00, TLI = 1.00
